# Supplementary material for: Transmission of ESBL-producing Enterobacteriaceae and their mobile genetic elements—identification of sources by whole genome sequencing: study protocol for an observational study in Switzerland
Source: PubMed Central journal article supplement — BMJ Open. 2018 Feb 17;8(2):e021823. doi: 10.1136/bmjopen-2018-021823 (PMC5855333; doi:10.1136/bmjopen-2018-021823), 2018-02-17
Supplement: bmjopen-2018-021823.draft_revisions.pdf [file bmjopen-2018-021823.draft_revisions.pdf]

# BMJ Open

BMJ Open is committed to open peer review. As part of this commitment we make the peer review history of every article we publish publicly available.

When an article is published we post the peer reviewers' comments and the authors' responses online. We also post the versions of the paper that were used during peer review. These are the versions that the peer review comments apply to.

The versions of the paper that follow are the versions that were submitted during the peer review process. They are not the versions of record or the final published versions. They should not be cited or distributed as the published version of this manuscript.

BMJ Open is an open access journal and the full, final, typeset and author-corrected version of record of the manuscript is available on our site with no access controls, subscription charges or pay-per-view fees (<http://bmjopen.bmj.com>).

If you have any questions on BMJ Open's open peer review process please email [info.bmjopen@bmj.com](mailto:info.bmjopen@bmj.com)

# BMJ Open

## Transmission of ESBL-producing Enterobacteriaceae and their mobile genetic elements – identification of sources by whole genome sequencing: study protocol for an observational study in Switzerland

|                               |                                                                                                                                                                                                                                                                                                                                                                                                                                                                                                                                                                                                                                                                                                                                                                                                                                                                                                                                                                                                                                                                                                                                                                                                                                                                                                                                                                                                                                                                                                                                                                                                                                                                                                                                                                                                                                                                                                              |
|-------------------------------|--------------------------------------------------------------------------------------------------------------------------------------------------------------------------------------------------------------------------------------------------------------------------------------------------------------------------------------------------------------------------------------------------------------------------------------------------------------------------------------------------------------------------------------------------------------------------------------------------------------------------------------------------------------------------------------------------------------------------------------------------------------------------------------------------------------------------------------------------------------------------------------------------------------------------------------------------------------------------------------------------------------------------------------------------------------------------------------------------------------------------------------------------------------------------------------------------------------------------------------------------------------------------------------------------------------------------------------------------------------------------------------------------------------------------------------------------------------------------------------------------------------------------------------------------------------------------------------------------------------------------------------------------------------------------------------------------------------------------------------------------------------------------------------------------------------------------------------------------------------------------------------------------------------|
| Journal:                      | <i>BMJ Open</i>                                                                                                                                                                                                                                                                                                                                                                                                                                                                                                                                                                                                                                                                                                                                                                                                                                                                                                                                                                                                                                                                                                                                                                                                                                                                                                                                                                                                                                                                                                                                                                                                                                                                                                                                                                                                                                                                                              |
| Manuscript ID                 | bmjopen-2018-021823                                                                                                                                                                                                                                                                                                                                                                                                                                                                                                                                                                                                                                                                                                                                                                                                                                                                                                                                                                                                                                                                                                                                                                                                                                                                                                                                                                                                                                                                                                                                                                                                                                                                                                                                                                                                                                                                                          |
| Article Type:                 | Protocol                                                                                                                                                                                                                                                                                                                                                                                                                                                                                                                                                                                                                                                                                                                                                                                                                                                                                                                                                                                                                                                                                                                                                                                                                                                                                                                                                                                                                                                                                                                                                                                                                                                                                                                                                                                                                                                                                                     |
| Date Submitted by the Author: | 19-Jan-2018                                                                                                                                                                                                                                                                                                                                                                                                                                                                                                                                                                                                                                                                                                                                                                                                                                                                                                                                                                                                                                                                                                                                                                                                                                                                                                                                                                                                                                                                                                                                                                                                                                                                                                                                                                                                                                                                                                  |
| Complete List of Authors:     | <p>Stadler, Tanja; Eidgenössische Technische Hochschule (ETH) Zürich, Basel, Switzerland, Department of Biosystems Science and Engineering; Swiss Institute of Bioinformatics, Lausanne, Switzerland</p> <p>Meinel, Dominik; University Hospital Basel, Basel, Switzerland, Division of Clinical Microbiology; University of Basel, Basel, Switzerland, Applied Microbiology Research, Department of Biomedicine</p> <p>Aguilar-Bultet, Lisandra; University Hospital Basel, University Basel, Basel, Switzerland, Division of Infectious Diseases and Infection Control</p> <p>Huisman, Jana ; Swiss Institute of Bioinformatics, Lausanne, Switzerland; Eidgenössische Technische Hochschule (ETH) Zürich, Zürich, Switzerland, Department of Environmental Systems Science</p> <p>Schindler, Ruth; University Hospital Basel, Basel, Switzerland, Division of Infectious Diseases and Infection Control</p> <p>Egli, Adrian; University Hospital Basel, Basel, Switzerland, Division of Clinical Microbiology; University of Basel, Basel, Switzerland, Applied Microbiology Research, Department of Biomedicine</p> <p>Seth-Smith, Helena; University Hospital Basel, Basel, Switzerland, Division of Clinical Microbiology; University of Basel, Basel, Switzerland, Applied Microbiology Research, Department of Biomedicine</p> <p>Eichenberger, Lucas; State Laboratory Basel-City, Basel, Switzerland, Biosafety Laboratory</p> <p>Brodmann, Peter; State Laboratory Basel-City, Basel, Switzerland, Biosafety Laboratory</p> <p>Hübner, Philipp; State Laboratory Basel-City, Basel, Switzerland</p> <p>Bagutti, Claudia; State Laboratory Basel-City, Basel, Switzerland, Biosafety Laboratory</p> <p>Tschudin Sutter, Sarah; University Hospital Basel, Division of Infectious Diseases &amp; Hospital Epidemiology; University Hospital Basel, Switzerland, Department of Clinical Research</p> |
| Keywords:                     | Extended-spectrum beta-lactamases, Enterobacteriaceae, ESBL, one-health, EPIDEMIOLOGY, Plasmids                                                                                                                                                                                                                                                                                                                                                                                                                                                                                                                                                                                                                                                                                                                                                                                                                                                                                                                                                                                                                                                                                                                                                                                                                                                                                                                                                                                                                                                                                                                                                                                                                                                                                                                                                                                                              |

SCHOLARONE™  
Manuscripts

1  
2  
3  
4  
5  
6  
7  
8  
9  
10  
11  
12  
13  
14  
15  
16  
17  
18  
19  
20  
21  
22  
23  
24  
25  
26  
27  
28  
29  
30  
31  
32  
33  
34  
35  
36  
37  
38  
39  
40  
41  
42  
43  
44  
45  
46  
47  
48  
49  
50  
51  
52  
53  
54  
55  
56  
57  
58  
59  
60

For peer review only

1  
2  
3 **Transmission of ESBL-producing Enterobacteriaceae and their mobile genetic elements**  
4  
5 **– identification of sources by whole genome sequencing: study protocol for an**  
6  
7 **observational study in Switzerland**  
8  
9

10  
11 Tanja Stadler<sup>1,2</sup>, Dominik Meinel<sup>3,4</sup>, Lisandra Aguilar-Bultet<sup>5</sup>, Jana S. Huisman<sup>2,6</sup>, Ruth  
12 Schindler<sup>5</sup>, Adrian Egli<sup>3,4</sup>, Helena MB Seth-Smith<sup>3,4</sup>, Lucas Eichenberger<sup>7</sup>, Peter Brodmann<sup>7</sup>,  
13 Philipp Hübner<sup>7</sup>, Claudia Bagutti<sup>7</sup>, Sarah Tschudin-Sutter<sup>5,8</sup>  
14  
15

16  
17  
18  
19  
20 <sup>1</sup>Department of Biosystems Science and Engineering, Eidgenössische Technische Hochschule (ETH)  
21 Zürich, Basel, Switzerland  
22

23  
24 <sup>2</sup>Swiss Institute of Bioinformatics, Lausanne, Switzerland  
25

26 <sup>3</sup>Division of Clinical Microbiology, University Hospital Basel, Basel, Switzerland  
27

28 <sup>4</sup>Applied Microbiology Research, Department of Biomedicine, University of Basel, Basel, Switzerland  
29

30 <sup>5</sup>Department of Infectious Diseases and Infection Control, University Hospital Basel, University  
31 Basel, Basel, Switzerland  
32

33  
34 <sup>6</sup>Department of Environmental Systems Science, Eidgenössische Technische Hochschule (ETH)  
35 Zürich, Zürich, Switzerland  
36

37  
38 <sup>7</sup>State Laboratory Basel-City, Biosafety Laboratory, Basel, Switzerland  
39

40 <sup>8</sup>Department of Clinical Research, University Hospital Basel, Switzerland  
41  
42  
43

44 **Corresponding author**  
45

46 PD Dr. med. Sarah Tschudin-Sutter  
47 Division of Infectious Diseases and Hospital Epidemiology  
48 University Hospital Basel  
49 Petersgraben 4  
50 CH-4031 Basel  
51 Switzerland  
52  
53 Tel.: +41 61 265 25 25  
54  
55 E-mail: sarah.tschudin@usb.ch  
56  
57  
58  
59  
60

## Abstract

### *Introduction*

Extended-spectrum beta-lactamases (ESBL)-producing Enterobacteriaceae were first described in relation with hospital-acquired infections. In the 2000s, the epidemiology of ESBL-producing organisms changed as especially ESBL-*E. coli* was increasingly described as an important cause of community-acquired infections, supporting the hypothesis that in more recent years ESBL-producing Enterobacteriaceae have probably been imported into hospitals rather than vice versa. Transmission of ESBL-producing Enterobacteriaceae is complicated by ESBL genes being encoded on self-transmissible plasmids, which can be exchanged among the same and different bacterial species. The aim of this research project is to quantify hospital-wide transmission of ESBL-producing Enterobacteriaceae on both the level of bacterial species and the mobile genetic elements, and to determine if hospital-acquired infections caused by ESBL-producers are related to strains and mobile genetic elements predominantly circulating in the community or in the healthcare setting. This distinction is critical in prevention since the former emphasizes the urgent need to establish or reinforce antibiotic stewardship programs, and the latter would call for more rigorous infection control.

### *Methods and analysis*

This protocol presents an observational study, which will be performed at the University Hospital Basel and in the city of Basel, Switzerland. ESBL-producing Enterobacteriaceae will be collected from any specimens obtained by routine clinical practice or by active screening in both in-and outpatient settings, as well as from wastewater samples and foodstuffs, both collected monthly over a 12-month period for analyses by whole genome sequencing.

1  
2  
3 Bacterial chromosomal, plasmid and ESBL-gene sequences will be compared within the  
4  
5 cohort to determine genetic relatedness and migration between humans and their environment.  
6  
7

8  
9 *Ethics and dissemination*  
10

11 This study has been approved by the local ethics committee (Ethikkommission Nordwest-und  
12  
13 Zentralschweiz) as a quality control project (Project-ID 2017-00100). The results of this study  
14  
15 will be published in peer-reviewed medical journals, communicated to participants, the  
16  
17 general public and all relevant stakeholders.  
18  
19  
20  
21  
22  
23  
24  
25  
26  
27  
28  
29  
30  
31  
32  
33  
34  
35  
36  
37  
38  
39  
40  
41  
42  
43  
44  
45  
46  
47  
48  
49  
50  
51  
52  
53  
54  
55  
56  
57  
58  
59  
60

### Strengths and limitations of this study

- This study applies an interdisciplinary, “one-health” approach, using state of the art technologies to investigate diverse sources entertaining and promoting the current epidemic of extended-spectrum beta-lactamases (ESBL)-producing Enterobacteriaceae.
- The single center study design may limit generalizability to other settings.
- Lack of systematic surveillance of all patients entering and exiting the healthcare institution may result in missed transmission events.
- The obtained knowledge on transmission of ESBL-producing Enterobacteriaceae on both the level of bacterial species and mobile genetic elements will provide a sound foundation for tailoring specific measures to prevent further spread.

## Introduction

Transmission of extended-spectrum beta-lactamases (ESBL)-producing Enterobacteriaceae challenges healthcare facilities worldwide regarding the implementation of effective infection control measures to limit further nosocomial spread. ESBL-producing Enterobacteriaceae were first described in 1983<sup>1</sup> in relation to hospital-acquired infections and have rapidly increased globally ever since. In the 2000s, the epidemiology of ESBL-producing organisms changed as especially *E. coli* producing the CTX-M ESBL-type was increasingly described as an important cause of community-acquired urinary tract infections worldwide,<sup>2</sup> supporting the hypothesis that in more recent years ESBL-producing Enterobacteriaceae have probably been imported into hospitals rather than vice versa. Possible community-sources may include foodstuffs<sup>3</sup> and colonization resulting from global travel, especially to the Indian subcontinent.<sup>4</sup> Furthermore, ESBL-producing Enterobacteriaceae have been recovered in water samples from Swiss rivers and lakes,<sup>5</sup> possibly constituting an underappreciated exposure route for dissemination of antibiotic resistance. Transmission of ESBL-producing Enterobacteriaceae is further complicated by ESBL genes being encoded on self-transmissible plasmids, which can be exchanged among the same and different species of Enterobacteriaceae. The contribution of this horizontal transfer of plasmids carrying ESBL genes between Enterobacteriaceae to the epidemiology of ESBL-producers, however, remains elusive, as analyses of plasmids is challenging due to their flexible architecture and the non-availability of suitable reference sequences, as they are far less conserved than bacterial chromosomes.

Overall, multiple levels of transmission of strains, plasmids and possibly genes, as well as different reservoirs, such as healthcare settings, foodstuffs and water, require investigation using a “one-health”-approach to elucidate the most important drivers of the current ESBL-epidemic. Detailed knowledge on the specific contribution of these different sources is currently lacking, despite being a key requirement for tailoring effective infection control



1  
2  
3 interventions in healthcare settings to limit further spread. Typing of bacterial strains is the  
4  
5 prerequisite for studying transmission. Until recently, techniques such as pulsed-field gel  
6  
7 electrophoresis (PFGE) or multilocus sequence typing (MLST) were considered the reference  
8  
9 standards,<sup>6</sup> however, these lack the resolution to differentiate closely related strains, which is  
10  
11 needed for a deeper understanding of the current ESBL-epidemic. Furthermore, these  
12  
13 techniques are not able to distinguish mobile genetic elements.<sup>7</sup> Whole genome sequencing  
14  
15 (WGS) allows the identification of single-nucleotide polymorphisms (SNPs) that differentiate  
16  
17 chromosomes and mobile genetic elements at the highest possible resolution, therefore  
18  
19 enabling investigation of strain and plasmid relatedness by phylogenetic analyses, and  
20  
21 ultimately leading to detailed exploration of transmission pathways.<sup>8</sup> This technique has to  
22  
23 date not been applied to determine transmission of both strains and plasmids in a large  
24  
25 epidemiological study including clinically relevant ESBL-Enterobacteriaceae-strains and  
26  
27 isolates recovered from community settings. A key resource at our institution is a strain  
28  
29 collection of all ESBL-producing Enterobacteriaceae recovered from any specimens obtained  
30  
31 by routine clinical practice in both in and outpatient settings since 2003, representing a unique  
32  
33 collection of clinically relevant strains over time.  
34  
35  
36  
37  
38

### 39 *Aim and objectives*

40  
41 The aim of this research project is to investigate the transmission of ESBL-producing  
42  
43 Enterobacteriaceae on both the level of bacterial chromosomes and mobile genetic elements,  
44  
45 and to determine the source of hospital-acquired infections. This data is critical for prevention  
46  
47 since community-acquisition emphasizes the urgent need to establish or reinforce antibiotic  
48  
49 stewardship programs, and nosocomial acquisition would call for more rigorous infection  
50  
51 control. The specific aims include:  
52  
53  
54  
55  
56  
57  
58  
59  
60

- 1  
2  
3 1. To quantify the extent of hospital-wide transmission of ESBL-producing  
4  
5 Enterobacteriaceae by assessing the genetic relatedness of ESBL-producing  
6  
7 Enterobacteriaceae among patients and over time.
- 8  
9 2. To estimate the contribution of horizontal gene transfer to the spread of ESBL-producing  
10  
11 Enterobacteriaceae in both hospital- and community settings.
- 12  
13 3. To determine migration of ESBL-producing Enterobacteriaceae between humans and their  
14  
15 environment (i.e. foodstuffs and wastewater samples) by comparing genetic relatedness of  
16  
17 strains and plasmids recovered from patients and the environment, as a “one-health”-  
18  
19 approach.  
20  
21  
22  
23  
24  
25  
26  
27  
28  
29  
30  
31  
32  
33  
34  
35  
36  
37  
38  
39  
40  
41  
42  
43  
44  
45  
46  
47  
48  
49  
50  
51  
52  
53  
54  
55  
56  
57  
58  
59  
60

## Methods and analysis

### *Setting*

The University Hospital Basel is a tertiary academic care center admitting more than 35,000 adult patients annually and comprising 813 beds. It provides acute care and hospital services in the city of Basel (approximate population, 200,000) and serves as a referral center for patients requiring specialized medical care for the north-western part of Switzerland. Its outpatient clinics provide both general and specialized medical care.

In keeping with current guidelines, the following infection control practices are in effect at our institution:

#### *Active Surveillance for ESBL-carriage*

Since 2003, all patients with recovery of ESBL-producing Enterobacteriaceae from any specimens obtained by routine clinical practice in both in-and outpatient settings are routinely screened to determine further colonization sites. In addition, all patients with known ESBL-carriage are screened, whenever they are readmitted to the hospital. Furthermore, the following patient populations are routinely screened for ESBL carriage at our institution: 1) all patients hospitalized for at least 24 hours in the same room as a patient colonized or infected with an ESBL-producing Enterobacteriaceae, 2) since 2013, patients admitted to the intensive care units and requiring mechanical ventilation, and 3) since 2015, all patients transferred directly from a hospital abroad and all admitted asylum seekers. Screening for ESBL-carriage is carried out by selective plating of rectal swabs, swabs from any open wounds or drainages, as well as urine samples from patients with foley catheters.<sup>9</sup>

### *Standard precautions*

Standard precautions have been implemented at our institution since 1999. They include the proper use of hand hygiene (as indicated in the WHO and CDC guidelines)<sup>10 11</sup> for any patient contact and the use of personal protective equipment (i.e. gloves, gowns, masks, eye protection) for procedures involving contact with body fluids as outlined by the CDC guidelines.<sup>10</sup>

### *Contact precautions*

Contact precautions involve assignment to a single room, as well as use of gloves and gowns by both healthcare workers and visitors on entrance.<sup>10</sup>

As of 1999, contact precaution measures were implemented for all patients infected or colonized with ESBL-producing Enterobacteriaceae. From January 2012 contact precaution measures were discontinued for patients infected or colonized with ESBL-*E. coli*, based on the finding of low transmission rates at our institution.<sup>12</sup>

### *Strain collection at the microbiology laboratory of the University Hospital Basel*

Since January 2003, all ESBL-producing Enterobacteriaceae isolates recovered from any specimens obtained by routine clinical practice in both in and outpatient settings of the University Hospital Basel, Switzerland have been collected and stored at the Division of Clinical Microbiology, representing a unique collection of clinically relevant strains. Serial isolates from the same patient are collected and stored if the date of isolation is over two months from detection of the first strain.

### *Study design*

We propose a two-stage approach:

1  
2  
3 a) **Retrospective study** (addresses study aims 1 and 2): Whole genome sequencing will be  
4 performed on representative ESBL-strains collected from January 2003 to December 2016 at  
5 the University Hospital Basel. The epidemiological relationships (as defined below) between  
6 patients with genetically related strains of ESBL-producing Enterobacteriaceae and cases with  
7 genetically related plasmids carrying the respective ESBL genes will be assessed.  
8  
9  
10  
11  
12

13  
14  
15 b) **Prospective study** (addresses study aims 1 and 2 and additionally study aim 3): Whole  
16 genome sequencing will be performed on representative ESBL-strains collected over a two-  
17 year study period at the University Hospital Basel, from samples from the wastewater system  
18 of both the hospital and the city of Basel, and from foodstuff samples collected from both the  
19 hospital and the city of Basel. Foodstuffs will be collected monthly from two stores and  
20 wastewater samples from representative sites of the wastewater network system in each of the  
21 ten postal code districts of the city of Basel over one to two years. The epidemiological  
22 relationships (as defined below) between patients, as well as environmental samples with  
23 genetically related strains of ESBL-producing Enterobacteriaceae and cases with genetically  
24 related plasmids carrying the respective ESBL genes will be assessed.  
25  
26  
27  
28  
29  
30  
31  
32  
33  
34  
35  
36  
37  
38  
39  
40

#### 41 ***Epidemiologic data and classification***

42 The following data is systematically assessed and available for all patients admitted to our  
43 institution or treated in one of the outpatient clinics: demographics, movement throughout the  
44 hospital (including detailed information regarding rooms and wards occupied during the  
45 hospital stay), home postal code districts and assigned general medical practices.  
46  
47  
48  
49  
50  
51

52 Epidemiological relationships between genetically related cases will be classified as follows:

- 53  
54 – **Hospital room contact:** patients hospitalized in the same room during the same time  
55 period or up to one week after discharge  
56  
57  
58  
59  
60

- 1  
2  
3 – **Hospital ward contact:** patients hospitalized on the same hospital ward during the same  
4  
5 time period or up to one week after discharge  
6
- 7 – **Hospital-wide contact:** patients hospitalized during the same time period or up to one  
8  
9 week after discharge  
10
- 11 – **Outpatient contact:** patients receiving outpatient care within the same outpatient clinic or  
12  
13 at the same general medicine practice.  
14
- 15 – **Community contact (between patients):** patients living in the same postal code district.  
16
- 17 – **Community contact (between patients and the environment)** patients, foodstuff  
18  
19 samples and/or wastewater samples deriving from the same postal code district.  
20  
21  
22

### 23 24 *Sample collection*

#### 25 26 27 28 *Patient samples*

29  
30 All ESBL-producing Enterobacteriaceae recovered from any specimens obtained by routine  
31  
32 clinical practice or by active screening (as detailed above) in both in- and out-patient settings  
33  
34 of the University Hospital Basel, Switzerland, have been collected and stored at the Division  
35  
36 of Clinical Microbiology since January 2003. This collection will be continued throughout the  
37  
38 study period.  
39  
40  
41  
42

#### 43 44 *Wastewater samples*

45  
46 Wastewater samples will be collected monthly during the prospective part of the study. In  
47  
48 collaboration with the civil engineering department of the city of Basel (Tiefbauamt Basel  
49  
50 Stadt), 20 specific sampling sites reflecting the different postal code areas of the city (two per  
51  
52 postal code area) have been chosen. In addition, wastewater will be collected from the main  
53  
54 wastewater outlet of the University Hospital Basel.  
55  
56  
57  
58  
59  
60

### *Samples from foodstuff*

Samples from foodstuff will be collected monthly during the prospective part of this study. Foodstuffs will be bought from two stores from each different postal code area. In addition, foodstuffs will be collected from the hospital kitchen.<sup>13 14</sup> Based on the results of prior studies confirming the presence of ESBL-producing Enterobacteriaceae in foodstuffs in Switzerland, we plan to investigate the following foodstuffs: poultry<sup>13</sup> (detection of ESBL-producers in 50% of samples, personal communication Kantonales Laboratorium Basel-Stadt), fresh herbs, sprouts<sup>15</sup> (detection of ESBL-producers in 17% of samples, personal communication Kantonales Laboratorium Basel-Stadt) and salads. Both local and imported produce will be sampled.<sup>16</sup>

### *Sample processing*

The patient specimens will be analysed for ESBL-producers according to the routine diagnostic procedures in the Clinical Microbiology laboratory of the University Hospital Basel. Food and environmental samples will be processed in close collaboration with the local health authority (Kantonales Laboratorium Basel-Stadt). Isolates identified as producing ESBL will be subjected to WGS for further epidemiological investigations.

### ***Molecular epidemiology based on WGS***

Investigation of the spread and transmission of ESBL-producers will be carried out using WGS on two important levels. First, we will analyse the bacterial chromosomal sequences to follow transmission of the bacteria. This will allow for the detection of classical spread of ESBL-producing bacteria. Second, we will analyse the ESBL-encoding plasmids to see whether transmission is occurring between bacterial strains. Transmission of a plasmid or even the uptake of free plasmids could result in ESBL spread between different lineages of bacteria or even between different Enterobacteriaceae species.

1  
2  
3 To identify the transmission events of bacteria and their plasmids, we will combine different  
4  
5 WGS approaches, like Illumina<sup>®</sup> and long read sequencing technologies. For analysis of  
6  
7 bacterial chromosomes, various methodologies will be applied and compared in order to get  
8  
9 the most accurate phylogenetic relationships among all the strains. Core-genome MultiLocus  
10  
11 Sequence Typing (cgMLST) and SNP-based methods will be evaluated in this respect.

12  
13 In the second part we will compare the above chromosomal phylogenies with those generated  
14  
15 by similar analysis of the ESBL-plasmids, such that we can observe horizontal transfer. Using  
16  
17 WGS we generate information about the plasmids of each isolate in parallel to the  
18  
19 chromosomal sequences. We are currently setting up an allele based analysis pipeline,  
20  
21 interrogating the assemblies of all isolate genomes for the presence of plasmid replicons<sup>17</sup>,  
22  
23 genes encoding ESBL enzymes and other antibiotic resistances.  
24  
25  
26  
27  
28

### 29 **Quantitative data analyses and modelling**

30  
31 Based on the sequencing data, we will reveal to what extent patients with and without an  
32  
33 epidemiological link cluster together, giving a proxy for the transmission of bacterial strains.  
34  
35 Significant clustering in plasmid phylogenies where strains have more divergent  
36  
37 chromosomal phylogenies will indicate horizontal gene transfer. Furthermore, assessing the  
38  
39 transmission rates before and after omitting contact isolation precautions at the University  
40  
41 Hospital Basel in 2012 for both bacteria and mobile elements will enhance our knowledge on  
42  
43 the spread of multi-resistance in a hospital setting, thus directly impacting contact isolation  
44  
45 policies in healthcare settings.  
46  
47

48 All phylogenies based on WGS will be inferred using BEAST v2.0<sup>18</sup> employing our  
49  
50 previously developed tool for quantifying transmission rates.<sup>19</sup> BEAST is a Bayesian  
51  
52 inference tool, which takes into account the phylogenetic uncertainty observed in such closely  
53  
54 related pathogen data. Furthermore, BEAST infers trees with branch lengths denoting  
55  
56 calendar time allowing us to link transmission times in the tree with epidemiological links.  
57  
58  
59



1  
2  
3 In the final “one-health” approach, we will use phylogenies based on ESBL strains from  
4 patients, foodstuffs and wastewater samples to determine the amount of transmission of  
5 bacteria and plasmids between these different sources. Again the phylogeny is interpreted as a  
6 proxy for transmission. If the strains or mobile genetic elements from different sources (i.e.  
7 hospital, foodstuffs, wastewater) cluster with each other in the phylogeny, but strains from  
8 different sources do not mix in the phylogeny, we have an indication for very limited  
9 interaction between sources. On the other hand, mixing of strains in the phylogeny from  
10 different sources indicates ongoing transmission between sources. Quantification of  
11 transmission events will allow us to analyse the contribution of each source to human ESBL-  
12 infections.  
13  
14  
15  
16  
17  
18  
19  
20  
21  
22  
23  
24  
25

26 The methodologies for data analyses and modelling could be subject to certain modifications  
27 during the execution of the project  
28  
29  
30  
31  
32  
33  
34  
35  
36  
37  
38  
39  
40  
41  
42  
43  
44  
45  
46  
47  
48  
49  
50  
51  
52  
53  
54  
55  
56  
57  
58  
59  
60

## Limitations

This study has some important limitations. The single center study design may limit generalizability to other settings and the lack of systematic surveillance of all patients entering and exiting the healthcare institution may result in missed transmission events. To extend the scope of our study, in a next step our strains could be also compared with genomes from other studies in order to contextualize our isolates against a global collection. More detailed analysis of isolates which share plasmid markers (*e.g.* both isolates share an identical ESBL encoding gene and at least one identical replicon sequence) will require optimised assemblies of the genomic data. ESBL plasmids are very large (up to 200kb) and present technical challenges with regards to assembly. We are currently evaluating several strategies. First, improvement of *de novo* sequence assembly by optimizing the bioinformatics data analysis pipeline by exclusion of chromosomal sequences. Second, sequencing of purified plasmids to yield higher and more even coverage than when sequencing the complete genome, enabling better assembly. Therefore, we are currently testing various commercially available kits to efficiently recover such large plasmids. Third, application of long read sequencing strategies. Pacbio<sup>®</sup> and MinION<sup>®</sup> sequencing yield read lengths of several kilobases. The combination of multiple technologies will improve the quality of the genome assemblies obtained by Illumina, either by scaffolding the previously obtained contigs, or by performing *de novo* assembly with the long reads and further quality control with the short Illumina<sup>®</sup> reads. Fourth, we will use already established tools such as Placnet<sup>20</sup> to reconstruct the plasmids based on additional information such as scaffolding, coverage and database comparisons. Finally, the obtained full plasmid sequences from key reference isolates will be incorporated into a local database together with already published sequences for resistance plasmids, which can be used as reference to calculate relatedness and transmission of plasmids in more detail. Mapping against a comprehensive database of plasmids will allow us

1  
2  
3  
4  
5  
6  
7  
8  
9  
10  
11  
12  
13  
14  
15  
16  
17  
18  
19  
20  
21  
22  
23  
24  
25  
26  
27  
28  
29  
30  
31  
32  
33  
34  
35  
36  
37  
38  
39  
40  
41  
42  
43  
44  
45  
46  
47  
48  
49  
50  
51  
52  
53  
54  
55  
56  
57  
58  
59  
60

to thoroughly analyse the relatedness of all plasmids. The database can also be published and made available to the public to facilitate downstream projects on plasmid transmission.

For peer review only

### **Ethics and dissemination**

This study has been approved by the local ethics committee (Ethikkommission Nordwest-und Zentralschweiz) as a quality control project (Project-ID 2017-00100).

We plan to present the results of this research project at national and international scientific meetings. We aim to publish our results in open access journals so they are widely available to interested international audiences. We aim to make our sequencing data available to the research community so that distribution of strains and plasmids can be assessed on both a national and international level. Such a database could provide a sound basis for tracking outbreaks and transmission between institutions and countries.

We expect our results to inform infection control strategies in healthcare settings. The division of Infectious Diseases and Hospital Epidemiology of the University Hospital Basel will tailor their infection control interventions accordingly. On a national level, our implementation partner will be SwissNoso, which publishes national guidelines for infection control measures in healthcare settings, as well as the Swiss Society for Infectious Diseases and the Federal Office of Public Health, which are currently developing strategies for national Antibiotic Stewardship interventions.

Our results may reveal foodstuffs as a relevant source of transmission of ESBL-producers and may suggest changes to wastewater management. The responsible authorities on the cantonal level (the cantonal laboratory, which belongs to the cantonal health authorities) are directly involved in this research project.

## References

1. Bradford PA. Extended-spectrum beta-lactamases in the 21st century: characterization, epidemiology, and detection of this important resistance threat. *Clin Microbiol Rev* 2001;14(4):933-51, table of contents. doi: 10.1128/CMR.14.4.933-951.2001
2. Pitout JD, Nordmann P, Laupland KB, et al. Emergence of Enterobacteriaceae producing extended-spectrum beta-lactamases (ESBLs) in the community. *J Antimicrob Chemother* 2005;56(1):52-9. doi: 10.1093/jac/dki166
3. Kluytmans JA, Overdevest IT, Willemsen I, et al. Extended-spectrum beta-lactamase-producing *Escherichia coli* from retail chicken meat and humans: comparison of strains, plasmids, resistance genes, and virulence factors. *Clin Infect Dis* 2013;56(4):478-87. doi: 10.1093/cid/cis929 [published Online First: 2012/12/18]
4. Kuenzli E, Jaeger VK, Frei R, et al. High colonization rates of extended-spectrum beta-lactamase (ESBL)-producing *Escherichia coli* in Swiss travellers to South Asia- a prospective observational multicentre cohort study looking at epidemiology, microbiology and risk factors. *BMC Infect Dis* 2014;14:528. doi: 10.1186/1471-2334-14-528
5. Zurfluh K, Hachler H, Nuesch-Inderbinen M, et al. Characteristics of extended-spectrum beta-lactamase- and carbapenemase-producing Enterobacteriaceae Isolates from rivers and lakes in Switzerland. *Appl Environ Microbiol* 2013;79(9):3021-6. doi: 10.1128/AEM.00054-13
6. Tschudin-Sutter S, Frei R, Battegay M, et al. Extended spectrum ss-lactamase-producing *Escherichia coli* in neonatal care unit. *Emerg Infect Dis* 2010;16(11):1758-60. doi: 10.3201/eid1611.100366 [published Online First: 2010/10/30]
7. Bertelli C, Greub G. Rapid bacterial genome sequencing: methods and applications in clinical microbiology. *Clin Microbiol Infect* 2013;19(9):803-13. doi: 10.1111/1469-0691.12217

- 1  
2  
3 8. Eyre DW, Cule ML, Wilson DJ, et al. Diverse sources of *C. difficile* infection identified on  
4  
5 whole-genome sequencing. *N Engl J Med* 2013;369(13):1195-205. doi:  
6  
7 10.1056/NEJMoa1216064  
8
- 9 9. Tschudin-Sutter S, Frei R, Dangel M, et al. Sites of colonization with extended-spectrum  
10  
11 beta-lactamases (ESBL)-producing enterobacteriaceae: the rationale for screening.  
12  
13 *Infect Control Hosp Epidemiol* 2012;33(11):1170-1. doi: 10.1086/668027 [published  
14  
15 Online First: 2012/10/09]  
16
- 17 10. Siegel JD, Rhinehart E, Jackson M, et al. 2007 Guideline for Isolation Precautions:  
18  
19 Preventing Transmission of Infectious Agents in Health Care Settings. *Am J Infect*  
20  
21 *Control* 2007;35(10 Suppl 2):S65-164. doi: 10.1016/j.ajic.2007.10.007 [published  
22  
23 Online First: 2007/12/11]  
24  
25
- 26 11. Safety WAfP. The Global Patient Safety Challenge 2005–2006 “Clean Care Is Safer  
27  
28 Care.” Geneva, World Health Organization, 2005 Available at  
29  
30 <http://www.who.int/gpsc/en/> Accessed December 1, 2008 2005  
31  
32
- 33 12. Tschudin-Sutter S, Frei R, Dangel M, et al. Rate of transmission of extended-spectrum  
34  
35 Beta-lactamase-producing enterobacteriaceae without contact isolation. *Clin Infect Dis*  
36  
37 2012;55(11):1505-11. doi: 10.1093/cid/cis770 [published Online First: 2012/09/08]  
38  
39
- 40 13. Tschudin-Sutter S, Frei R, Stephan R, et al. Extended-spectrum beta-lactamase (ESBL)-  
41  
42 producing Enterobacteriaceae: a threat from the kitchen. *Infect Control Hosp*  
43  
44 *Epidemiol* 2014;35(5):581-4. doi: 10.1086/675831  
45
- 46 14. Stewardson AJ, Renzi G, Maury N, et al. Extended-spectrum beta-lactamase-producing  
47  
48 Enterobacteriaceae in hospital food: a risk assessment. *Infect Control Hosp Epidemiol*  
49  
50 2014;35(4):375-83. doi: 10.1086/675609  
51  
52
- 53 15. Nuesch-Inderbinen M, Zurfluh K, Peterhans S, et al. Assessment of the Prevalence of  
54  
55 Extended-Spectrum beta-Lactamase-Producing Enterobacteriaceae in Ready-to-Eat  
56  
57  
58  
59  
60

- 1  
2  
3 Salads, Fresh-Cut Fruit, and Sprouts from the Swiss Market. *J Food Prot*  
4  
5 2015;78(6):1178-81. doi: 10.4315/0362-028X.JFP-15-018  
6
- 7 16. Zurfluh K, Nuesch-Inderbinen M, Morach M, et al. Extended-spectrum-beta-lactamase-  
8  
9 producing Enterobacteriaceae isolated from vegetables imported from the Dominican  
10  
11 Republic, India, Thailand, and Vietnam. *Appl Environ Microbiol* 2015;81(9):3115-20.  
12  
13 doi: 10.1128/AEM.00258-15  
14
- 15 17. Carattoli A, Zankari E, Garcia-Fernandez A, et al. In silico detection and typing of  
16  
17 plasmids using PlasmidFinder and plasmid multilocus sequence typing. *Antimicrob*  
18  
19 *Agents Chemother* 2014;58(7):3895-903. doi: 10.1128/AAC.02412-14  
20  
21
- 22 18. Bouckaert R, Heled J, Kuhnert D, et al. BEAST 2: a software platform for Bayesian  
23  
24 evolutionary analysis. *PLoS Comput Biol* 2014;10(4):e1003537. doi:  
25  
26 10.1371/journal.pcbi.1003537  
27
- 28 19. Stadler T, Kuhnert D, Bonhoeffer S, et al. Birth-death skyline plot reveals temporal  
29  
30 changes of epidemic spread in HIV and hepatitis C virus (HCV). *Proc Natl Acad Sci*  
31  
32 *U S A* 2013;110(1):228-33. doi: 10.1073/pnas.1207965110  
33  
34
- 35 20. Lanza VF, de Toro M, Garcillan-Barcia MP, et al. Plasmid flux in Escherichia coli ST131  
36  
37 sublineages, analyzed by plasmid constellation network (PLACNET), a new method  
38  
39 for plasmid reconstruction from whole genome sequences. *PLoS Genet*  
40  
41 2014;10(12):e1004766. doi: 10.1371/journal.pgen.1004766  
42  
43  
44  
45  
46  
47  
48  
49  
50  
51  
52  
53  
54  
55  
56  
57  
58  
59  
60

### **Author's contributions**

**TS:** Co-applicant, contributed to designing the protocol, reviewed intellectual content of this paper.

**DM:** Co-applicant, contributed to designing the protocol, reviewed intellectual content of this paper.

**LAB:** Advises on the sequencing methodology, reviewed this paper for intellectual content.

**JH:** Advises on the phylogenetic analysis, reviewed this paper for intellectual content.

**RS:** Advises on environmental sampling strategies, reviewed this paper for intellectual content.

**AE:** Advises on the sequencing methodology, reviewed this paper for intellectual content.

**HSS:** Advises on the sequencing methodology, reviewed this paper for intellectual content.

**LE:** Collection and analysis of environmental samples, reviewed this paper for intellectual content.

**PB:** Advises on collection and analysis of environmental samples, reviewed this paper for intellectual content.

**PH:** Advises on collection and analysis of environmental samples, reviewed this paper for intellectual content.

**CB:** Advises on collection and analysis of environmental samples, reviewed this paper for intellectual content.

**STS:** Principal investigator and corresponding author, initiated, designed and drafted the protocol, coordinated all collaborations.



**Funding statement**

This work is supported by the Swiss National Science Foundation (407240\_167060) as part of the National Research Programm (NRP72) “Antimicrobial resistance” and the Gottfried & Julia Bangerter-Rhyner Stiftung.

**Competing interests statement**

S. Tschudin-Sutter is a member of the Astellas Fidaxomicin Advisory Board and a member of the MSD *C. difficile* Advisory Board. She has received unrestricted research grants from Astellas.

**Acknowledgements**

We thank the team of the civil engineering department of the city of Basel (Tiefbauamt Basel Stadt) for providing access and collecting wastewater samples. We thank the team of the Division of Clinical Microbiology at the University Hospital Basel for collection of the clinical samples.

# BMJ Open

## Transmission of ESBL-producing Enterobacteriaceae and their mobile genetic elements – identification of sources by whole genome sequencing: study protocol for an observational study in Switzerland

|                                 |                                                                                                                                                                                                                                                                                                                                                                                                                                                                                                                                                                                                                                                                                                                                                                                                                                                                                                                                                                                                                                                                                                                                                                                                                                                                                                                                                                                                                                                                                                                                                                                                                                                                                                                                                                                                                                                                                                                          |
|---------------------------------|--------------------------------------------------------------------------------------------------------------------------------------------------------------------------------------------------------------------------------------------------------------------------------------------------------------------------------------------------------------------------------------------------------------------------------------------------------------------------------------------------------------------------------------------------------------------------------------------------------------------------------------------------------------------------------------------------------------------------------------------------------------------------------------------------------------------------------------------------------------------------------------------------------------------------------------------------------------------------------------------------------------------------------------------------------------------------------------------------------------------------------------------------------------------------------------------------------------------------------------------------------------------------------------------------------------------------------------------------------------------------------------------------------------------------------------------------------------------------------------------------------------------------------------------------------------------------------------------------------------------------------------------------------------------------------------------------------------------------------------------------------------------------------------------------------------------------------------------------------------------------------------------------------------------------|
| Journal:                        | <i>BMJ Open</i>                                                                                                                                                                                                                                                                                                                                                                                                                                                                                                                                                                                                                                                                                                                                                                                                                                                                                                                                                                                                                                                                                                                                                                                                                                                                                                                                                                                                                                                                                                                                                                                                                                                                                                                                                                                                                                                                                                          |
| Manuscript ID                   | bmjopen-2018-021823.R1                                                                                                                                                                                                                                                                                                                                                                                                                                                                                                                                                                                                                                                                                                                                                                                                                                                                                                                                                                                                                                                                                                                                                                                                                                                                                                                                                                                                                                                                                                                                                                                                                                                                                                                                                                                                                                                                                                   |
| Article Type:                   | Protocol                                                                                                                                                                                                                                                                                                                                                                                                                                                                                                                                                                                                                                                                                                                                                                                                                                                                                                                                                                                                                                                                                                                                                                                                                                                                                                                                                                                                                                                                                                                                                                                                                                                                                                                                                                                                                                                                                                                 |
| Date Submitted by the Author:   | 24-Jan-2018                                                                                                                                                                                                                                                                                                                                                                                                                                                                                                                                                                                                                                                                                                                                                                                                                                                                                                                                                                                                                                                                                                                                                                                                                                                                                                                                                                                                                                                                                                                                                                                                                                                                                                                                                                                                                                                                                                              |
| Complete List of Authors:       | <p>Stadler, Tanja; Eidgenössische Technische Hochschule (ETH) Zürich, Basel, Switzerland, Department of Biosystems Science and Engineering; Swiss Institute of Bioinformatics, Lausanne, Switzerland</p> <p>Meinel, Dominik; University Hospital Basel, Basel, Switzerland, Division of Clinical Microbiology; University of Basel, Basel, Switzerland, Applied Microbiology Research, Department of Biomedicine</p> <p>Aguilar-Bultet, Lisandra; University Hospital Basel, University Basel, Basel, Switzerland, Division of Infectious Diseases &amp; Hospital Epidemiology</p> <p>Huisman, Jana ; Swiss Institute of Bioinformatics, Lausanne, Switzerland; Eidgenössische Technische Hochschule (ETH) Zürich, Zürich, Switzerland, Department of Environmental Systems Science</p> <p>Schindler, Ruth; University Hospital Basel, Basel, Switzerland, Division of Infectious Diseases &amp; Hospital Epidemiology</p> <p>Egli, Adrian; University Hospital Basel, Basel, Switzerland, Division of Clinical Microbiology; University of Basel, Basel, Switzerland, Applied Microbiology Research, Department of Biomedicine</p> <p>Seth-Smith, Helena; University Hospital Basel, Basel, Switzerland, Division of Clinical Microbiology; University of Basel, Basel, Switzerland, Applied Microbiology Research, Department of Biomedicine</p> <p>Eichenberger, Lucas; State Laboratory Basel-City, Basel, Switzerland, Biosafety Laboratory</p> <p>Brodmann, Peter; State Laboratory Basel-City, Basel, Switzerland, Biosafety Laboratory</p> <p>Hübner, Philipp; State Laboratory Basel-City, Basel, Switzerland</p> <p>Bagutti, Claudia; State Laboratory Basel-City, Basel, Switzerland, Biosafety Laboratory</p> <p>Tschudin-Sutter, Sarah; University Hospital Basel, Division of Infectious Diseases &amp; Hospital Epidemiology; University Hospital Basel, Switzerland, Department of Clinical Research</p> |
| <b>Primary Subject Heading</b>: | Infectious diseases                                                                                                                                                                                                                                                                                                                                                                                                                                                                                                                                                                                                                                                                                                                                                                                                                                                                                                                                                                                                                                                                                                                                                                                                                                                                                                                                                                                                                                                                                                                                                                                                                                                                                                                                                                                                                                                                                                      |
| Secondary Subject Heading:      | Infectious diseases, Epidemiology                                                                                                                                                                                                                                                                                                                                                                                                                                                                                                                                                                                                                                                                                                                                                                                                                                                                                                                                                                                                                                                                                                                                                                                                                                                                                                                                                                                                                                                                                                                                                                                                                                                                                                                                                                                                                                                                                        |
| Keywords:                       | Extended-spectrum beta-lactamases, Enterobacteriaceae, ESBL, one-health, EPIDEMIOLOGY, Plasmids                                                                                                                                                                                                                                                                                                                                                                                                                                                                                                                                                                                                                                                                                                                                                                                                                                                                                                                                                                                                                                                                                                                                                                                                                                                                                                                                                                                                                                                                                                                                                                                                                                                                                                                                                                                                                          |
|                                 |                                                                                                                                                                                                                                                                                                                                                                                                                                                                                                                                                                                                                                                                                                                                                                                                                                                                                                                                                                                                                                                                                                                                                                                                                                                                                                                                                                                                                                                                                                                                                                                                                                                                                                                                                                                                                                                                                                                          |

1  
2  
3  
4  
5  
6  
7  
8  
9  
10  
11  
12  
13  
14  
15  
16  
17  
18  
19  
20  
21  
22  
23  
24  
25  
26  
27  
28  
29  
30  
31  
32  
33  
34  
35  
36  
37  
38  
39  
40  
41  
42  
43  
44  
45  
46  
47  
48  
49  
50  
51  
52  
53  
54  
55  
56  
57  
58  
59  
60

SCHOLARONE™  
Manuscripts

For peer review only

1  
2  
3 **Transmission of ESBL-producing Enterobacteriaceae and their mobile genetic elements**  
4  
5 **– identification of sources by whole genome sequencing: study protocol for an**  
6  
7 **observational study in Switzerland**  
8  
9

10  
11 Tanja Stadler<sup>1,2</sup>, Dominik Meinel<sup>3,4</sup>, Lisandra Aguilar-Bultet<sup>5</sup>, Jana S. Huisman<sup>2,6</sup>, Ruth  
12 Schindler<sup>5</sup>, Adrian Egli<sup>3,4</sup>, Helena MB Seth-Smith<sup>3,4</sup>, Lucas Eichenberger<sup>7</sup>, Peter Brodmann<sup>7</sup>,  
13 Philipp Hübner<sup>7</sup>, Claudia Bagutti<sup>7</sup>, Sarah Tschudin-Sutter<sup>5,8</sup>  
14  
15

16  
17  
18  
19  
20 <sup>1</sup>Department of Biosystems Science and Engineering, Eidgenössische Technische Hochschule (ETH)  
21 Zürich, Basel, Switzerland  
22

23  
24 <sup>2</sup>Swiss Institute of Bioinformatics, Lausanne, Switzerland  
25

26  
27 <sup>3</sup>Division of Clinical Microbiology, University Hospital Basel, Basel, Switzerland  
28

29  
30 <sup>4</sup>Applied Microbiology Research, Department of Biomedicine, University of Basel, Basel, Switzerland  
31

32  
33 <sup>5</sup>Division of Infectious Diseases & Hospital Epidemiology, University Hospital Basel, University  
34 Basel, Basel, Switzerland  
35

36  
37 <sup>6</sup>Department of Environmental Systems Science, Eidgenössische Technische Hochschule (ETH)  
38 Zürich, Zürich, Switzerland  
39

40  
41 <sup>7</sup>Biosafety Laboratory, State Laboratory Basel-City, Basel, Switzerland  
42

43  
44 <sup>8</sup>Department of Clinical Research, University Hospital Basel, Switzerland  
45

46  
47 **Corresponding author**  
48

49 PD Dr. med. Sarah Tschudin-Sutter  
50 Division of Infectious Diseases and Hospital Epidemiology  
51 University Hospital Basel  
52 Petersgraben 4  
53 CH-4031 Basel  
54 Switzerland  
55 Tel.: +41 61 265 25 25  
56 E-mail: sarah.tschudin@usb.ch  
57  
58  
59  
60

## Abstract

### *Introduction*

Extended-spectrum beta-lactamases (ESBL)-producing Enterobacteriaceae were first described in relation with hospital-acquired infections. In the 2000s, the epidemiology of ESBL-producing organisms changed as especially ESBL-*E. coli* was increasingly described as an important cause of community-acquired infections, supporting the hypothesis that in more recent years ESBL-producing Enterobacteriaceae have probably been imported into hospitals rather than vice versa. Transmission of ESBL-producing Enterobacteriaceae is complicated by ESBL genes being encoded on self-transmissible plasmids, which can be exchanged among the same and different bacterial species. The aim of this research project is to quantify hospital-wide transmission of ESBL-producing Enterobacteriaceae on both the level of bacterial species and the mobile genetic elements, and to determine if hospital-acquired infections caused by ESBL-producers are related to strains and mobile genetic elements predominantly circulating in the community or in the healthcare setting. This distinction is critical in prevention since the former emphasizes the urgent need to establish or reinforce antibiotic stewardship programs, and the latter would call for more rigorous infection control.

### *Methods and analysis*

This protocol presents an observational study, which will be performed at the University Hospital Basel and in the city of Basel, Switzerland. ESBL-producing Enterobacteriaceae will be collected from any specimens obtained by routine clinical practice or by active screening in both in-and outpatient settings, as well as from wastewater samples and foodstuffs, both collected monthly over a 12-month period for analyses by whole genome sequencing.

1  
2  
3 Bacterial chromosomal, plasmid and ESBL-gene sequences will be compared within the  
4  
5 cohort to determine genetic relatedness and migration between humans and their environment.  
6  
7

8  
9 *Ethics and dissemination*  
10

11 This study has been approved by the local ethics committee (Ethikkommission Nordwest-und  
12  
13 Zentralschweiz) as a quality control project (Project-ID 2017-00100). The results of this study  
14  
15 will be published in peer-reviewed medical journals, communicated to participants, the  
16  
17 general public and all relevant stakeholders.  
18  
19  
20  
21  
22  
23  
24  
25  
26  
27  
28  
29  
30  
31  
32  
33  
34  
35  
36  
37  
38  
39  
40  
41  
42  
43  
44  
45  
46  
47  
48  
49  
50  
51  
52  
53  
54  
55  
56  
57  
58  
59  
60

### Strengths and limitations of this study

- This study applies an interdisciplinary, “one-health” approach, using state of the art technologies to investigate diverse sources entertaining and promoting the current epidemic of extended-spectrum beta-lactamases (ESBL)-producing Enterobacteriaceae.
- The single center study design may limit generalizability to other settings.
- Lack of systematic surveillance of all patients entering and exiting the healthcare institution may result in missed transmission events.
- The obtained knowledge on transmission of ESBL-producing Enterobacteriaceae on both the level of bacterial species and mobile genetic elements will provide a sound foundation for tailoring specific measures to prevent further spread.

## Introduction

Transmission of extended-spectrum beta-lactamases (ESBL)-producing Enterobacteriaceae challenges healthcare facilities worldwide regarding the implementation of effective infection control measures to limit further nosocomial spread. ESBL-producing Enterobacteriaceae were first described in 1983<sup>1</sup> in relation to hospital-acquired infections and have rapidly increased globally ever since. In the 2000s, the epidemiology of ESBL-producing organisms changed as especially *E. coli* producing the CTX-M ESBL-type was increasingly described as an important cause of community-acquired urinary tract infections worldwide,<sup>2</sup> supporting the hypothesis that in more recent years ESBL-producing Enterobacteriaceae have probably been imported into hospitals rather than vice versa. Possible community-sources may include foodstuffs<sup>3</sup> and colonization resulting from global travel, especially to the Indian subcontinent.<sup>4</sup> Furthermore, ESBL-producing Enterobacteriaceae have been recovered in water samples from Swiss rivers and lakes,<sup>5</sup> possibly constituting an underappreciated exposure route for dissemination of antibiotic resistance. Transmission of ESBL-producing Enterobacteriaceae is further complicated by ESBL genes being encoded on self-transmissible plasmids, which can be exchanged among the same and different species of Enterobacteriaceae. The contribution of this horizontal transfer of plasmids carrying ESBL genes between Enterobacteriaceae to the epidemiology of ESBL-producers, however, remains elusive, as analyses of plasmids is challenging due to their flexible architecture and the non-availability of suitable reference sequences, as they are far less conserved than bacterial chromosomes.

Overall, multiple levels of transmission of strains, plasmids and possibly genes, as well as different reservoirs, such as healthcare settings, foodstuffs and water, require investigation using a “one-health”-approach to elucidate the most important drivers of the current ESBL-epidemic. Detailed knowledge on the specific contribution of these different sources is currently lacking, despite being a key requirement for tailoring effective infection control



1  
2  
3 interventions in healthcare settings to limit further spread. Typing of bacterial strains is the  
4 prerequisite for studying transmission. Until recently, techniques such as pulsed-field gel  
5 electrophoresis (PFGE) or multilocus sequence typing (MLST) were considered the reference  
6 standards,<sup>6</sup> however, these lack the resolution to differentiate closely related strains, which is  
7 needed for a deeper understanding of the current ESBL-epidemic. Furthermore, these  
8 techniques are not able to distinguish mobile genetic elements.<sup>7</sup> Whole genome sequencing  
9 (WGS) allows the identification of single-nucleotide polymorphisms (SNPs) that differentiate  
10 chromosomes and mobile genetic elements at the highest possible resolution, therefore  
11 enabling investigation of strain and plasmid relatedness by phylogenetic analyses, and  
12 ultimately leading to detailed exploration of transmission pathways.<sup>8</sup> This technique has to  
13 date not been applied to determine transmission of both strains and plasmids in a large  
14 epidemiological study including clinically relevant ESBL-Enterobacteriaceae-strains and  
15 isolates recovered from community settings. A key resource at our institution is a strain  
16 collection of all ESBL-producing Enterobacteriaceae recovered from any specimens obtained  
17 by routine clinical practice in both in and outpatient settings since 2003, representing a unique  
18 collection of clinically relevant strains over time.

### 39 *Aim and objectives*

40  
41 The aim of this research project is to investigate the transmission of ESBL-producing  
42 Enterobacteriaceae on both the level of bacterial chromosomes and mobile genetic elements,  
43 and to determine the source of hospital-acquired infections. This data is critical for prevention  
44 since community-acquisition emphasizes the urgent need to establish or reinforce antibiotic  
45 stewardship programs, and nosocomial acquisition would call for more rigorous infection  
46 control. The specific aims include:  
47  
48  
49  
50  
51  
52  
53

- 1  
2  
3 1. To quantify the extent of hospital-wide transmission of ESBL-producing  
4 Enterobacteriaceae by assessing the genetic relatedness of ESBL-producing  
5 Enterobacteriaceae among patients and over time.  
6  
7
- 8  
9 2. To estimate the contribution of horizontal gene transfer to the spread of ESBL-producing  
10 Enterobacteriaceae in both hospital- and community settings.  
11  
12
- 13 3. To determine migration of ESBL-producing Enterobacteriaceae between humans and their  
14 environment (i.e. foodstuffs and wastewater samples) by comparing genetic relatedness of  
15 strains and plasmids recovered from patients and the environment, as a “one-health”-  
16 approach.  
17  
18  
19  
20  
21  
22  
23  
24  
25  
26  
27  
28  
29  
30  
31  
32  
33  
34  
35  
36  
37  
38  
39  
40  
41  
42  
43  
44  
45  
46  
47  
48  
49  
50  
51  
52  
53  
54  
55  
56  
57  
58  
59  
60

## Methods and analysis

### *Setting*

The University Hospital Basel is a tertiary academic care center admitting more than 35,000 adult patients annually and comprising 813 beds. It provides acute care and hospital services in the city of Basel (approximate population, 200,000) and serves as a referral center for patients requiring specialized medical care for the north-western part of Switzerland. Its outpatient clinics provide both general and specialized medical care.

In keeping with current guidelines, the following infection control practices are in effect at our institution:

#### *Active Surveillance for ESBL-carriage*

Since 2003, all patients with recovery of ESBL-producing Enterobacteriaceae from any specimens obtained by routine clinical practice in both in-and outpatient settings are routinely screened to determine further colonization sites. In addition, all patients with known ESBL-carriage are screened, whenever they are readmitted to the hospital. Furthermore, the following patient populations are routinely screened for ESBL carriage at our institution: 1) all patients hospitalized for at least 24 hours in the same room as a patient colonized or infected with an ESBL-producing Enterobacteriaceae, 2) since 2013, patients admitted to the intensive care units and requiring mechanical ventilation, and 3) since 2015, all patients transferred directly from a hospital abroad and all admitted asylum seekers. Screening for ESBL-carriage is carried out by selective plating of rectal swabs, swabs from any open wounds or drainages, as well as urine samples from patients with foley catheters.<sup>9</sup>

### *Standard precautions*

Standard precautions have been implemented at our institution since 1999. They include the proper use of hand hygiene (as indicated in the WHO and CDC guidelines)<sup>10 11</sup> for any patient contact and the use of personal protective equipment (i.e. gloves, gowns, masks, eye protection) for procedures involving contact with body fluids as outlined by the CDC guidelines.<sup>10</sup>

### *Contact precautions*

Contact precautions involve assignment to a single room, as well as use of gloves and gowns by both healthcare workers and visitors on entrance.<sup>10</sup>

As of 1999, contact precaution measures were implemented for all patients infected or colonized with ESBL-producing Enterobacteriaceae. From January 2012 contact precaution measures were discontinued for patients infected or colonized with ESBL-*E. coli*, based on the finding of low transmission rates at our institution.<sup>12</sup>

### *Strain collection at the microbiology laboratory of the University Hospital Basel*

Since January 2003, all ESBL-producing Enterobacteriaceae isolates recovered from any specimens obtained by routine clinical practice in both in and outpatient settings of the University Hospital Basel, Switzerland have been collected and stored at the Division of Clinical Microbiology, representing a unique collection of clinically relevant strains. Serial isolates from the same patient are collected and stored if the date of isolation is over two months from detection of the first strain.

### *Study design*

We propose a two-stage approach:

1  
2  
3 a) **Retrospective study** (addresses study aims 1 and 2): Whole genome sequencing will be  
4 performed on representative ESBL-strains collected from January 2003 to December 2016 at  
5 the University Hospital Basel. The epidemiological relationships (as defined below) between  
6 patients with genetically related strains of ESBL-producing Enterobacteriaceae and cases with  
7 genetically related plasmids carrying the respective ESBL genes will be assessed.  
8  
9  
10  
11  
12

13  
14  
15 b) **Prospective study** (addresses study aims 1 and 2 and additionally study aim 3): Whole  
16 genome sequencing will be performed on representative ESBL-strains collected over a two-  
17 year study period at the University Hospital Basel, from samples from the wastewater system  
18 of both the hospital and the city of Basel, and from foodstuff samples collected from both the  
19 hospital and the city of Basel. Foodstuffs will be collected monthly from two stores and  
20 wastewater samples from representative sites of the wastewater network system in each of the  
21 ten postal code districts of the city of Basel over one to two years. The epidemiological  
22 relationships (as defined below) between patients, as well as environmental samples with  
23 genetically related strains of ESBL-producing Enterobacteriaceae and cases with genetically  
24 related plasmids carrying the respective ESBL genes will be assessed.  
25  
26  
27  
28  
29  
30  
31  
32  
33  
34  
35  
36  
37  
38  
39  
40

#### ***Epidemiologic data and classification***

41 The following data is systematically assessed and available for all patients admitted to our  
42 institution or treated in one of the outpatient clinics: demographics, movement throughout the  
43 hospital (including detailed information regarding rooms and wards occupied during the  
44 hospital stay), home postal code districts and assigned general medical practices.  
45  
46  
47  
48  
49  
50  
51

52 Epidemiological relationships between genetically related cases will be classified as follows:

- 53  
54 – **Hospital room contact:** patients hospitalized in the same room during the same time  
55 period or up to one week after discharge  
56  
57  
58  
59  
60

- 1  
2  
3 – **Hospital ward contact:** patients hospitalized on the same hospital ward during the same  
4  
5 time period or up to one week after discharge  
6
- 7 – **Hospital-wide contact:** patients hospitalized during the same time period or up to one  
8  
9 week after discharge  
10
- 11 – **Outpatient contact:** patients receiving outpatient care within the same outpatient clinic or  
12  
13 at the same general medicine practice.  
14
- 15 – **Community contact (between patients):** patients living in the same postal code district.  
16
- 17 – **Community contact (between patients and the environment)** patients, foodstuff  
18  
19 samples and/or wastewater samples deriving from the same postal code district.  
20  
21  
22

### 23 24 *Sample collection*

#### 25 26 27 28 *Patient samples*

29  
30 All ESBL-producing Enterobacteriaceae recovered from any specimens obtained by routine  
31  
32 clinical practice or by active screening (as detailed above) in both in- and out-patient settings  
33  
34 of the University Hospital Basel, Switzerland, have been collected and stored at the Division  
35  
36 of Clinical Microbiology since January 2003. This collection will be continued throughout the  
37  
38 study period.  
39  
40  
41  
42

#### 43 44 *Wastewater samples*

45  
46 Wastewater samples will be collected monthly during the prospective part of the study. In  
47  
48 collaboration with the civil engineering department of the city of Basel (Tiefbauamt Basel  
49  
50 Stadt), 20 specific sampling sites reflecting the different postal code areas of the city (two per  
51  
52 postal code area) have been chosen. In addition, wastewater will be collected from the main  
53  
54 wastewater outlet of the University Hospital Basel.  
55  
56  
57  
58  
59  
60

### *Samples from foodstuff*

Samples from foodstuff will be collected monthly during the prospective part of this study. Foodstuffs will be bought from two stores from each different postal code area. In addition, foodstuffs will be collected from the hospital kitchen.<sup>13 14</sup> Based on the results of prior studies confirming the presence of ESBL-producing Enterobacteriaceae in foodstuffs in Switzerland, we plan to investigate the following foodstuffs: poultry<sup>13</sup> (detection of ESBL-producers in 50% of samples, personal communication Kantonales Laboratorium Basel-Stadt), fresh herbs, sprouts<sup>15</sup> (detection of ESBL-producers in 17% of samples, personal communication Kantonales Laboratorium Basel-Stadt) and salads. Both local and imported produce will be sampled.<sup>16</sup>

### *Sample processing*

The patient specimens will be analysed for ESBL-producers according to the routine diagnostic procedures in the Clinical Microbiology laboratory of the University Hospital Basel. Food and environmental samples will be processed in close collaboration with the local health authority (Kantonales Laboratorium Basel-Stadt). Isolates identified as producing ESBL will be subjected to WGS for further epidemiological investigations.

### ***Molecular epidemiology based on WGS***

Investigation of the spread and transmission of ESBL-producers will be carried out using WGS on two important levels. First, we will analyse the bacterial chromosomal sequences to follow transmission of the bacteria. This will allow for the detection of classical spread of ESBL-producing bacteria. Second, we will analyse the ESBL-encoding plasmids to see whether transmission is occurring between bacterial strains. Transmission of a plasmid or even the uptake of free plasmids could result in ESBL spread between different lineages of bacteria or even between different Enterobacteriaceae species.

1  
2  
3 To identify the transmission events of bacteria and their plasmids, we will combine different  
4  
5 WGS approaches, like Illumina<sup>®</sup> and long read sequencing technologies. For analysis of  
6  
7 bacterial chromosomes, various methodologies will be applied and compared in order to get  
8  
9 the most accurate phylogenetic relationships among all the strains. Core-genome MultiLocus  
10  
11 Sequence Typing (cgMLST) and SNP-based methods will be evaluated in this respect.

12  
13  
14 In the second part we will compare the above chromosomal phylogenies with those generated  
15  
16 by similar analysis of the ESBL-plasmids, such that we can observe horizontal transfer. Using  
17  
18 WGS we generate information about the plasmids of each isolate in parallel to the  
19  
20 chromosomal sequences. We are currently setting up an allele based analysis pipeline,  
21  
22 interrogating the assemblies of all isolate genomes for the presence of plasmid replicons<sup>17</sup>,  
23  
24 genes encoding ESBL enzymes and other antibiotic resistances.  
25  
26  
27  
28

### 29 **Quantitative data analyses and modelling**

30  
31 Based on the sequencing data, we will reveal to what extent patients with and without an  
32  
33 epidemiological link cluster together, giving a proxy for the transmission of bacterial strains.  
34  
35 Significant clustering in plasmid phylogenies where strains have more divergent  
36  
37 chromosomal phylogenies will indicate horizontal gene transfer. Furthermore, assessing the  
38  
39 transmission rates before and after omitting contact isolation precautions at the University  
40  
41 Hospital Basel in 2012 for both bacteria and mobile elements will enhance our knowledge on  
42  
43 the spread of multi-resistance in a hospital setting, thus directly impacting contact isolation  
44  
45 policies in healthcare settings.  
46  
47

48 All phylogenies based on WGS will be inferred using BEAST v2.0<sup>18</sup> employing our  
49  
50 previously developed tool for quantifying transmission rates.<sup>19</sup> BEAST is a Bayesian  
51  
52 inference tool, which takes into account the phylogenetic uncertainty observed in such closely  
53  
54 related pathogen data. Furthermore, BEAST infers trees with branch lengths denoting  
55  
56 calendar time allowing us to link transmission times in the tree with epidemiological links.  
57  
58  
59



1  
2  
3 In the final “one-health” approach, we will use phylogenies based on ESBL strains from  
4 patients, foodstuffs and wastewater samples to determine the amount of transmission of  
5 bacteria and plasmids between these different sources. Again the phylogeny is interpreted as a  
6 proxy for transmission. If the strains or mobile genetic elements from different sources (i.e.  
7 hospital, foodstuffs, wastewater) cluster with each other in the phylogeny, but strains from  
8 different sources do not mix in the phylogeny, we have an indication for very limited  
9 interaction between sources. On the other hand, mixing of strains in the phylogeny from  
10 different sources indicates ongoing transmission between sources. Quantification of  
11 transmission events will allow us to analyse the contribution of each source to human ESBL-  
12 infections.  
13  
14  
15  
16  
17  
18  
19  
20  
21  
22  
23  
24  
25

26 The methodologies for data analyses and modelling could be subject to certain modifications  
27 during the execution of the project  
28  
29  
30  
31  
32  
33  
34  
35  
36  
37  
38  
39  
40  
41  
42  
43  
44  
45  
46  
47  
48  
49  
50  
51  
52  
53  
54  
55  
56  
57  
58  
59  
60

## Limitations

This study has some important limitations. The single center study design may limit generalizability to other settings and the lack of systematic surveillance of all patients entering and exiting the healthcare institution may result in missed transmission events. To extend the scope of our study, in a next step our strains could be also compared with genomes from other studies in order to contextualize our isolates against a global collection. More detailed analysis of isolates which share plasmid markers (*e.g.* both isolates share an identical ESBL encoding gene and at least one identical replicon sequence) will require optimised assemblies of the genomic data. ESBL plasmids are very large (up to 200kb) and present technical challenges with regards to assembly. We are currently evaluating several strategies. First, improvement of *de novo* sequence assembly by optimizing the bioinformatics data analysis pipeline by exclusion of chromosomal sequences. Second, sequencing of purified plasmids to yield higher and more even coverage than when sequencing the complete genome, enabling better assembly. Therefore, we are currently testing various commercially available kits to efficiently recover such large plasmids. Third, application of long read sequencing strategies. Pacbio<sup>®</sup> and MinION<sup>®</sup> sequencing yield read lengths of several kilobases. The combination of multiple technologies will improve the quality of the genome assemblies obtained by Illumina, either by scaffolding the previously obtained contigs, or by performing *de novo* assembly with the long reads and further quality control with the short Illumina<sup>®</sup> reads. Fourth, we will use already established tools such as Placnet<sup>20</sup> to reconstruct the plasmids based on additional information such as scaffolding, coverage and database comparisons. Finally, the obtained full plasmid sequences from key reference isolates will be incorporated into a local database together with already published sequences for resistance plasmids, which can be used as reference to calculate relatedness and transmission of plasmids in more detail. Mapping against a comprehensive database of plasmids will allow us

1  
2  
3  
4  
5  
6  
7  
8  
9  
10  
11  
12  
13  
14  
15  
16  
17  
18  
19  
20  
21  
22  
23  
24  
25  
26  
27  
28  
29  
30  
31  
32  
33  
34  
35  
36  
37  
38  
39  
40  
41  
42  
43  
44  
45  
46  
47  
48  
49  
50  
51  
52  
53  
54  
55  
56  
57  
58  
59  
60

to thoroughly analyse the relatedness of all plasmids. The database can also be published and made available to the public to facilitate downstream projects on plasmid transmission.

For peer review only

### **Ethics and dissemination**

This study has been approved by the local ethics committee (Ethikkommission Nordwest-und Zentralschweiz) as a quality control project (Project-ID 2017-00100).

We plan to present the results of this research project at national and international scientific meetings. We aim to publish our results in open access journals so they are widely available to interested international audiences. We aim to make our sequencing data available to the research community so that distribution of strains and plasmids can be assessed on both a national and international level. Such a database could provide a sound basis for tracking outbreaks and transmission between institutions and countries.

We expect our results to inform infection control strategies in healthcare settings. The division of Infectious Diseases and Hospital Epidemiology of the University Hospital Basel will tailor their infection control interventions accordingly. On a national level, our implementation partner will be SwissNoso, which publishes national guidelines for infection control measures in healthcare settings, as well as the Swiss Society for Infectious Diseases and the Federal Office of Public Health, which are currently developing strategies for national Antibiotic Stewardship interventions.

Our results may reveal foodstuffs as a relevant source of transmission of ESBL-producers and may suggest changes to wastewater management. The responsible authorities on the cantonal level (the cantonal laboratory, which belongs to the cantonal health authorities) are directly involved in this research project.

## References

1. Bradford PA. Extended-spectrum beta-lactamases in the 21st century: characterization, epidemiology, and detection of this important resistance threat. *Clin Microbiol Rev* 2001;14(4):933-51, table of contents. doi: 10.1128/CMR.14.4.933-951.2001
2. Pitout JD, Nordmann P, Laupland KB, et al. Emergence of Enterobacteriaceae producing extended-spectrum beta-lactamases (ESBLs) in the community. *J Antimicrob Chemother* 2005;56(1):52-9. doi: 10.1093/jac/dki166
3. Kluytmans JA, Overdevest IT, Willemsen I, et al. Extended-spectrum beta-lactamase-producing *Escherichia coli* from retail chicken meat and humans: comparison of strains, plasmids, resistance genes, and virulence factors. *Clin Infect Dis* 2013;56(4):478-87. doi: 10.1093/cid/cis929 [published Online First: 2012/12/18]
4. Kuenzli E, Jaeger VK, Frei R, et al. High colonization rates of extended-spectrum beta-lactamase (ESBL)-producing *Escherichia coli* in Swiss travellers to South Asia- a prospective observational multicentre cohort study looking at epidemiology, microbiology and risk factors. *BMC Infect Dis* 2014;14:528. doi: 10.1186/1471-2334-14-528
5. Zurfluh K, Hachler H, Nuesch-Inderbinen M, et al. Characteristics of extended-spectrum beta-lactamase- and carbapenemase-producing Enterobacteriaceae Isolates from rivers and lakes in Switzerland. *Appl Environ Microbiol* 2013;79(9):3021-6. doi: 10.1128/AEM.00054-13
6. Tschudin-Sutter S, Frei R, Battegay M, et al. Extended spectrum ss-lactamase-producing *Escherichia coli* in neonatal care unit. *Emerg Infect Dis* 2010;16(11):1758-60. doi: 10.3201/eid1611.100366 [published Online First: 2010/10/30]
7. Bertelli C, Greub G. Rapid bacterial genome sequencing: methods and applications in clinical microbiology. *Clin Microbiol Infect* 2013;19(9):803-13. doi: 10.1111/1469-0691.12217

- 1  
2  
3 8. Eyre DW, Cule ML, Wilson DJ, et al. Diverse sources of *C. difficile* infection identified on  
4  
5 whole-genome sequencing. *N Engl J Med* 2013;369(13):1195-205. doi:  
6  
7 10.1056/NEJMoa1216064  
8
- 9  
10 9. Tschudin-Sutter S, Frei R, Dangel M, et al. Sites of colonization with extended-spectrum  
11  
12 beta-lactamases (ESBL)-producing enterobacteriaceae: the rationale for screening.  
13  
14 *Infect Control Hosp Epidemiol* 2012;33(11):1170-1. doi: 10.1086/668027 [published  
15  
16 Online First: 2012/10/09]  
17
- 18  
19 10. Siegel JD, Rhinehart E, Jackson M, et al. 2007 Guideline for Isolation Precautions:  
20  
21 Preventing Transmission of Infectious Agents in Health Care Settings. *Am J Infect*  
22  
23 *Control* 2007;35(10 Suppl 2):S65-164. doi: 10.1016/j.ajic.2007.10.007 [published  
24  
25 Online First: 2007/12/11]  
26
- 27  
28 11. Safety WAfP. The Global Patient Safety Challenge 2005–2006 “Clean Care Is Safer  
29  
30 Care.” Geneva, World Health Organization, 2005 Available at  
31  
32 <http://www.who.int/gpsc/en/> Accessed December 1, 2008 2005  
33
- 34  
35 12. Tschudin-Sutter S, Frei R, Dangel M, et al. Rate of transmission of extended-spectrum  
36  
37 Beta-lactamase-producing enterobacteriaceae without contact isolation. *Clin Infect Dis*  
38  
39 2012;55(11):1505-11. doi: 10.1093/cid/cis770 [published Online First: 2012/09/08]  
40
- 41  
42 13. Tschudin-Sutter S, Frei R, Stephan R, et al. Extended-spectrum beta-lactamase (ESBL)-  
43  
44 producing Enterobacteriaceae: a threat from the kitchen. *Infect Control Hosp*  
45  
46 *Epidemiol* 2014;35(5):581-4. doi: 10.1086/675831  
47
- 48  
49 14. Stewardson AJ, Renzi G, Maury N, et al. Extended-spectrum beta-lactamase-producing  
50  
51 Enterobacteriaceae in hospital food: a risk assessment. *Infect Control Hosp Epidemiol*  
52  
53 2014;35(4):375-83. doi: 10.1086/675609  
54
- 55  
56 15. Nuesch-Inderbinen M, Zurfluh K, Peterhans S, et al. Assessment of the Prevalence of  
57  
58 Extended-Spectrum beta-Lactamase-Producing Enterobacteriaceae in Ready-to-Eat  
59  
60

- 1  
2  
3 Salads, Fresh-Cut Fruit, and Sprouts from the Swiss Market. *J Food Prot*  
4  
5 2015;78(6):1178-81. doi: 10.4315/0362-028X.JFP-15-018  
6
- 7 16. Zurfluh K, Nuesch-Inderbinen M, Morach M, et al. Extended-spectrum-beta-lactamase-  
8  
9 producing Enterobacteriaceae isolated from vegetables imported from the Dominican  
10  
11 Republic, India, Thailand, and Vietnam. *Appl Environ Microbiol* 2015;81(9):3115-20.  
12  
13 doi: 10.1128/AEM.00258-15  
14
- 15 17. Carattoli A, Zankari E, Garcia-Fernandez A, et al. In silico detection and typing of  
16  
17 plasmids using PlasmidFinder and plasmid multilocus sequence typing. *Antimicrob*  
18  
19 *Agents Chemother* 2014;58(7):3895-903. doi: 10.1128/AAC.02412-14  
20  
21
- 22 18. Bouckaert R, Heled J, Kuhnert D, et al. BEAST 2: a software platform for Bayesian  
23  
24 evolutionary analysis. *PLoS Comput Biol* 2014;10(4):e1003537. doi:  
25  
26 10.1371/journal.pcbi.1003537  
27
- 28 19. Stadler T, Kuhnert D, Bonhoeffer S, et al. Birth-death skyline plot reveals temporal  
29  
30 changes of epidemic spread in HIV and hepatitis C virus (HCV). *Proc Natl Acad Sci*  
31  
32 *U S A* 2013;110(1):228-33. doi: 10.1073/pnas.1207965110  
33  
34
- 35 20. Lanza VF, de Toro M, Garcillan-Barcia MP, et al. Plasmid flux in Escherichia coli ST131  
36  
37 sublineages, analyzed by plasmid constellation network (PLACNET), a new method  
38  
39 for plasmid reconstruction from whole genome sequences. *PLoS Genet*  
40  
41 2014;10(12):e1004766. doi: 10.1371/journal.pgen.1004766  
42  
43  
44  
45  
46  
47  
48  
49  
50  
51  
52  
53  
54  
55  
56  
57  
58  
59  
60

### **Author's contributions**

**TS:** Co-applicant, contributed to designing the protocol, reviewed intellectual content of this paper.

**DM:** Co-applicant, contributed to designing the protocol, reviewed intellectual content of this paper.

**LAB:** Advises on the sequencing methodology, reviewed this paper for intellectual content.

**JH:** Advises on the phylogenetic analysis, reviewed this paper for intellectual content.

**RS:** Advises on environmental sampling strategies, reviewed this paper for intellectual content.

**AE:** Advises on the sequencing methodology, reviewed this paper for intellectual content.

**HSS:** Advises on the sequencing methodology, reviewed this paper for intellectual content.

**LE:** Collection and analysis of environmental samples, reviewed this paper for intellectual content.

**PB:** Advises on collection and analysis of environmental samples, reviewed this paper for intellectual content.

**PH:** Advises on collection and analysis of environmental samples, reviewed this paper for intellectual content.

**CB:** Advises on collection and analysis of environmental samples, reviewed this paper for intellectual content.

**STS:** Principal investigator and corresponding author, initiated, designed and drafted the protocol, coordinated all collaborations.



**Funding statement**

This work is supported by the Swiss National Science Foundation (407240\_167060) as part of the National Research Programm (NRP72) “Antimicrobial resistance” and the Gottfried & Julia Bangerter-Rhyner Stiftung.

**Competing interests statement**

S. Tschudin-Sutter is a member of the Astellas Fidaxomicin Advisory Board and a member of the MSD *C. difficile* Advisory Board. She has received unrestricted research grants from Astellas.

**Acknowledgements**

We thank the team of the civil engineering department of the city of Basel (Tiefbauamt Basel Stadt) for providing access and collecting wastewater samples. We thank the team of the Division of Clinical Microbiology at the University Hospital Basel for collection of the clinical samples.
