# Supplementary material for: Transmission of ESBL-producing Enterobacteriaceae and their mobile genetic elements—identification of sources by whole genome sequencing: study protocol for an observational study in Switzerland
Source: PubMed Central journal article supplement — BMJ Open. 2018 Feb 17;8(2):e021823. doi: 10.1136/bmjopen-2018-021823 (PMC5855333; doi:10.1136/bmjopen-2018-021823), 2018-02-17
Supplement: bmjopen-2018-021823.reviewer_comments.pdf [file bmjopen-2018-021823.reviewer_comments.pdf]

## PEER REVIEW HISTORY

BMJ Open publishes all reviews undertaken for accepted manuscripts. Reviewers are asked to complete a checklist review form (<http://bmjopen.bmj.com/site/about/resources/checklist.pdf>) and are provided with free text boxes to elaborate on their assessment. These free text comments are reproduced below.

## ARTICLE DETAILS

|                            |                                                                                                                                                                                                                                                          |
|----------------------------|----------------------------------------------------------------------------------------------------------------------------------------------------------------------------------------------------------------------------------------------------------|
| <b>TITLE (PROVISIONAL)</b> | Transmission of ESBL-producing Enterobacteriaceae and their mobile genetic elements – identification of sources by whole genome sequencing: study protocol for an observational study in Switzerland                                                     |
| <b>AUTHORS</b>             | Stadler, Tanja<br>Meinel, Dominik<br>Aguilar-Bultet, Lisandra<br>Huisman, Jana Sanne<br>Schindler, Ruth<br>Egli, Adrian<br>Seth-Smith, Helena<br>Eichenberger, Lucas<br>Brodmann, Peter<br>Hübner, Philipp<br>Bagutti, Claudia<br>Tschudin-Sutter, Sarah |

This article was not externally reviewed at BMJ Open. Protocols that have been independently assessed prior to submission to BMJ Open are usually fast-tracked to publication on the grounds that further substantial changes will not be possible. This independent assessment will usually be external, independent review for both a substantial grant award from a non-commercial or government funder and ethics approval.
